# Supplementary material for: Protein intrinsic disorder within the Potyvirus genus: from proteome-wide analysis to functional annotation
Source: Royal Society of Chemistry journal article supplement (doi:10.1039/c5mb00677e), 2015-12-11
Supplement: c5mb00677e1.xlsx [file c5mb00677e1.xlsx]

## Sheet: Feuil1
TABLE S1. List of sequence accessions used in this study. TaxID : Taxonomic Identifier in NCBI database (http://www.ncbi.nlm.nih.gov/). GI : GenBank Identifier. Symbols “*” correspond to sequences retrieved from SharCo database (http://www.sharco.eu/).
Species Name	Acronym	TaxID	NCBI Sequences Accessions (GI)
Bean Yellow Mosaic Virus	BYMV	12197	Total sequences : 16
			163930863
			218664786
			1354081
			19881394
			1217902
			37780263
			238035114
			109638255
			109638257
			238035116
			238035120
			109390061
			388240710
			238035118
			402756072
			562745024
Lettuce Mosaic Virus	LMV	12202	Total sequences : 23
			643433345
			643433351
			643433389
			643433371
			641483757
			1903232
			641483753
			643433365
			643433347
			643433349
			643433373
			643433357
			28193444
			9864420
			643433359
			643433353
			643433375
			643433385
			643433381
			643433377
			643433355
			643433367
			643433361
Plum Pox Virus	PPV	12211	Total sequences : 36
			90102165
			89143150
			TR98ap*
			GR19ap*
			AL14pe*
			AL11pl*
			TR322ap*
			5650729
			AL120my*
			FR67pe*
			190576805
			AL70ap*
			AL80pl*
			RO72ap*
			531731
			222408
			62766784
			CZ54pl*
			294769532
			SK23pe*
			RO22pl*
			FR66pl*
			157419767
			294769530
			CZ14my*
			294769534
			RO25pl*
			CN2ja*
			CZ7pl*
			FR64pl*
			RS67pl*
			340025614
			40252370
			327335415
			62766782
			327335419
Papaya Ringspot Virus	PRSV	12205	Total sequences : 27
			116109588
			121615481
			573465033
			27542791
			329763105
			29469899
			168997615
			87130665
			14581404
			551702287
			157399685
			258106
			61350
			9629244
			161168458
			195975850
			1771470
			408362879
			87130663
			23680941
			408362875
			85690827
			408362871
			85690823
			408362873
			85690825
			408362877
Potato Virus Y	PVY	12216	Total sequences : 39
			209395183
			482427295
			58613914
			27371967
			336318906
			186892492
			189187421
			56462531
			85376485
			158347632
			90968457
			90968455
			482661424
			482427275
			383101016
			482661426
			482661420
			482661432
			482661430
			257122583
			21913301
			336318968
			340815945
			340815947
			157679488
			116664524
			356707357
			465487346
			465487403
			307094821
			116664522
			307094819
			482661434
			116664526
			242276192
			336318898
			336318902
			336318954
			465487447
Soybean Mosaic Virus	SMV	12222	Total sequences : 37
			525569144
			525569141
			256587878
			253297
			256587860
			256587826
			34304610
			224593245
			32452358
			256587876
			256587838
			256587854
			256587856
			256587852
			256587828
			256587874
			27877110
			256587822
			256587842
			256587830
			256587836
			348499965
			348499963
			256587868
			254679812
			11995002
			226525453
			256587840
			256587848
			364285301
			519767289
			315419694
			519767282
			301087113
			261872238
			301087111
			364285303
Sugarcane Mosaic Virus	SCMV	12224	Total sequences : 15
			402216201
			27528454
			402695592
			402695594
			402216199
			20270985
			18621142
			18652414
			21632589
			24415606
			77403451
			159032828
			295647310
			340629655
			45774601
Turnip Mosaic Virus	TuMV	12230	Total sequences : 38
			460837895
			15055163
			460837983
			460837911
			460837903
			460837905
			33146222
			33146220
			114217198
			460837927
			114217152
			109706892
			460837989
			114217188
			216409654
			33146248
			460837947
			460837973
			109706890
			114217178
			124507406
			33146246
			114217234
			460837909
			114217154
			460837995
			460837965
			114217228
			114217214
			33146226
			114217158
			216409656
			33146218
			460837957
			460837907
			33146230
			114217208
			296531308
Watermelon Mosaic Virus	WMV	146500	Total sequences : 33
			327537117
			161168460
			540342156
			194399684
			326468188
			194399688
			194399698
			326468200
			194399702
			326468184
			326468182
			41058913
			51949945
			194399692
			194399700
			194399682
			194399704
			326468204
			268628057
			101918494
			326468190
			194399694
			326468186
			194399680
			194399690
			326468194
			194399686
			326468196
			326468198
			326468202
			88954063
			326468192
			194399696
Zucchini Mosaic Virus	ZYMV	12232	Total sequences : 24
			13940781
			466347
			17019510
			17059637
			73621258
			84993539
			84993541
			532235175
			532235177
			532235179
			532235181
			532235183
			532235187
			532235171
			532235173
			532235185
			118566318
			118566320
			37778797
			388542373
			33391222
			33391224
			161168462
			33391220
