# Supplementary material for: Protein intrinsic disorder within the Potyvirus genus: from proteome-wide analysis to functional annotation
Source: Royal Society of Chemistry journal article supplement (doi:10.1039/c5mb00677e), 2015-12-11
Supplement: c5mb00677e2.pdf [file c5mb00677e2.pdf]

Charon et al. Supplementary data

## Supplementary data

Cf. Excel File.

**TABLE S1. List of sequence accessions used in this study.** TaxID : Taxonomic Identifier in NCBI database (<http://www.ncbi.nlm.nih.gov/>). GI : GenBank Identifier. Symbols “\*” correspond to sequences retrieved from SharCo database (<http://www.sharco.eu/>).

**TABLE S2. Eukaryotic Linear Motifs (ELMs) highly conserved among proteins of 10 potyvirus species.** ELM predictions are retrieved from Hagai et al. 2014 (see Material and Methods). Their names refer to ELM database resource. <sup>(1)</sup> Conservation at inter-species level. Correspond to number of species in which corresponding motif is predicted. <sup>(2)</sup> Motifs listed in ELM database as experimentally described and functionally validated in plants and/or viruses. *PTM*: post-translational modification; *ND*: not listed in ELM database.

| ELM Name                  | Functional class      | ELM conservation in potyviral protein <sup>(1)</sup> | Present in taxon | Described in plants <sup>(2)</sup> | Described in viruses <sup>(2)</sup>                                                                                                      | Relevance in plant virus context |
|---------------------------|-----------------------|------------------------------------------------------|------------------|------------------------------------|------------------------------------------------------------------------------------------------------------------------------------------|----------------------------------|
| CLV_C14_Caspase3-7        | Cleavage              | P1(90%) ; CP(90%)                                    | Metazoa          | ND                                 | ND                                                                                                                                       | ×                                |
| CLV_NDR_NDR_1             | Cleavage              | P1(100%) ; VPg(60%)                                  | Metazoa          | ND                                 | ND                                                                                                                                       | ×                                |
| CLV_PCSK_PC1ET2_1         | Cleavage              | P1(100%)                                             | Vertebrates      | ND                                 | ND                                                                                                                                       | ×××                              |
| CLV_PCSK_SK11_1           | Cleavage              | P1(100%)                                             | Vertebrates      | ND                                 | ND                                                                                                                                       | ×××                              |
| <b>LIG_14-3-3_3</b>       | <b>Ligand</b>         | <b>P1(90%) ; CP(90%)</b>                             | <b>Eukaryota</b> | <b><i>Arabidopsis thaliana</i></b> | <b><i>Mouse polyomavirus</i></b>                                                                                                         | <b>✓✓✓</b>                       |
| LIG_Clathr_ClathBox_1     | Ligand                | P1(90%)                                              | Eukayota         | ND                                 | ND                                                                                                                                       | ×                                |
| DOC_CYCLIN_1              | Docking Ligand        | P1(90%)                                              | Eukaryota        | ND                                 | <i>Human papillomavirus</i>                                                                                                              | ✓                                |
| <b>LIG_FHA_1</b>          | <b>Ligand</b>         | <b>P1(90%)</b>                                       | <b>idem</b>      | <b><i>Arabidopsis thaliana</i></b> | <b>ND</b>                                                                                                                                | <b>✓✓✓</b>                       |
| LIG_FHA_2                 | Ligand                | P1(100%) ; VPg(70%) ; CP(100%)                       | Eukaryota        | ND                                 | ND                                                                                                                                       | ×                                |
| DOC_MAPK_1                | Docking Ligand        | P1(90%)                                              | Eukaryota        | ND                                 | ND                                                                                                                                       | ×                                |
| LIG_SH2_STAT5             | Ligand                | P1(80%) ; VPg(60%)                                   | Metazoa          | ND                                 | ND                                                                                                                                       | ×                                |
| LIG_SH3_3                 | Ligand                | P1(80%)                                              | Metazoa          | ND                                 | <i>Influenza A virus ; Hepatitis E virus Herpesvirus saimiri ;</i>                                                                       | ✓                                |
| LIG_USP7_1                | Ligand                | P1(100%) ; CP(80%)                                   | Eukaryota        | ND                                 | <i>Human Herpes virus</i>                                                                                                                | ✓                                |
| <b>DOC_WW_Pin1_4</b>      | <b>Docking Ligand</b> | <b>P1(100%)</b>                                      | <b>Eukaryota</b> | <b><i>Arabidopsis thaliana</i></b> | <b><i>Hepatitis B virus</i></b>                                                                                                          | <b>✓✓✓</b>                       |
| MOD_CK1_1                 | PTM                   | P1 ; VPg(70%) ; CP(80%)                              | Eukaryota        | ND                                 | ND                                                                                                                                       | ×                                |
| MOD_CK2_1                 | PTM                   | P1(100%) ; CP(100%)                                  | Eukaryota        | ND                                 | <i>Human immunodeficiency virus</i>                                                                                                      | ✓                                |
| MOD_GlcNHglycan           | PTM                   | P1(90%)                                              | Metazoa          | ND                                 | ND                                                                                                                                       | ×                                |
| MOD_GSK3_1                | PTM                   | P1 ; VPg(70%) ; CP(100%)                             | Eukaryota        | ND                                 | ND                                                                                                                                       | ×                                |
| MOD_PIKK_1                | PTM                   | P1(100%)                                             | Eukaryota        | ND                                 | ND                                                                                                                                       | ×                                |
| <b>MOD_PKA_2</b>          | <b>PTM</b>            | <b>P1 ; VPg(80%) ; CP(80%)</b>                       | <b>Eukaryota</b> | <b><i>Arabidopsis thaliana</i></b> | <b>ND</b>                                                                                                                                | <b>✓✓✓</b>                       |
| MOD_ProDKin_1             | PTM                   | P1(100%)                                             | Eukaryota        | ND                                 | ND                                                                                                                                       | ×                                |
| <b>TRG-NLS_MonoExtN_4</b> | <b>Targeting</b>      | <b>P1(80%) ; VPg (80%)</b>                           | <b>Eukaryota</b> | <b>ND</b>                          | <b><i>Avian Sarcoma virus ; Murine polyomavirus ; Simian virus 40 ; Cercopithecine herpesvirus ; Human herpesvirus ; Nipah virus</i></b> | <b>✓✓✓</b>                       |

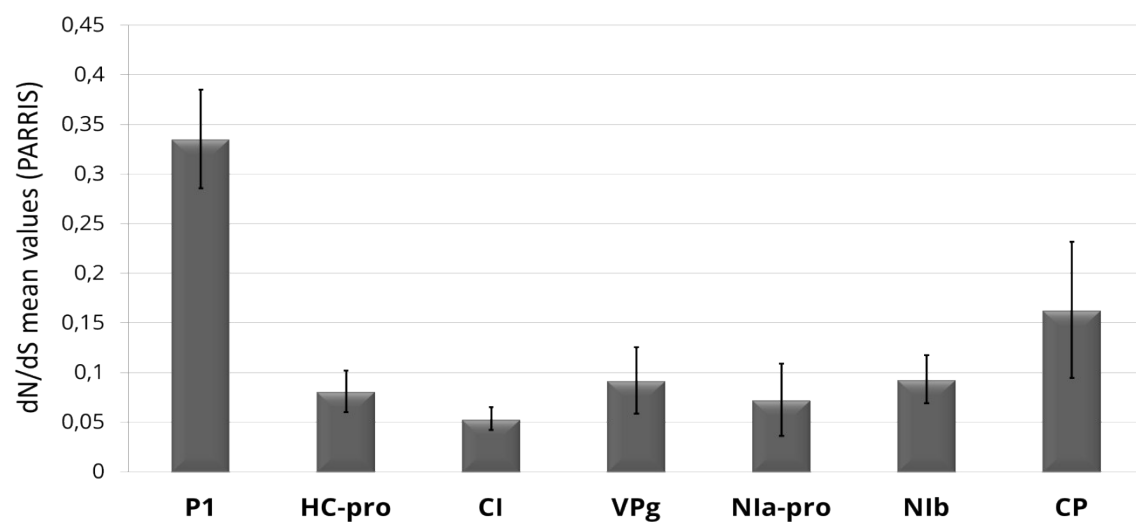

**FIG S1. Mean evolutionary constraints (dN/dS ratio or  $\omega$  value) exerted on Potyviral protein from 10 Potyvirus species.** dN/dS ratio were calculated with PARRIS method on each species protein dataset. Bar scaled represent variation of mean dN/dS value between species dataset.

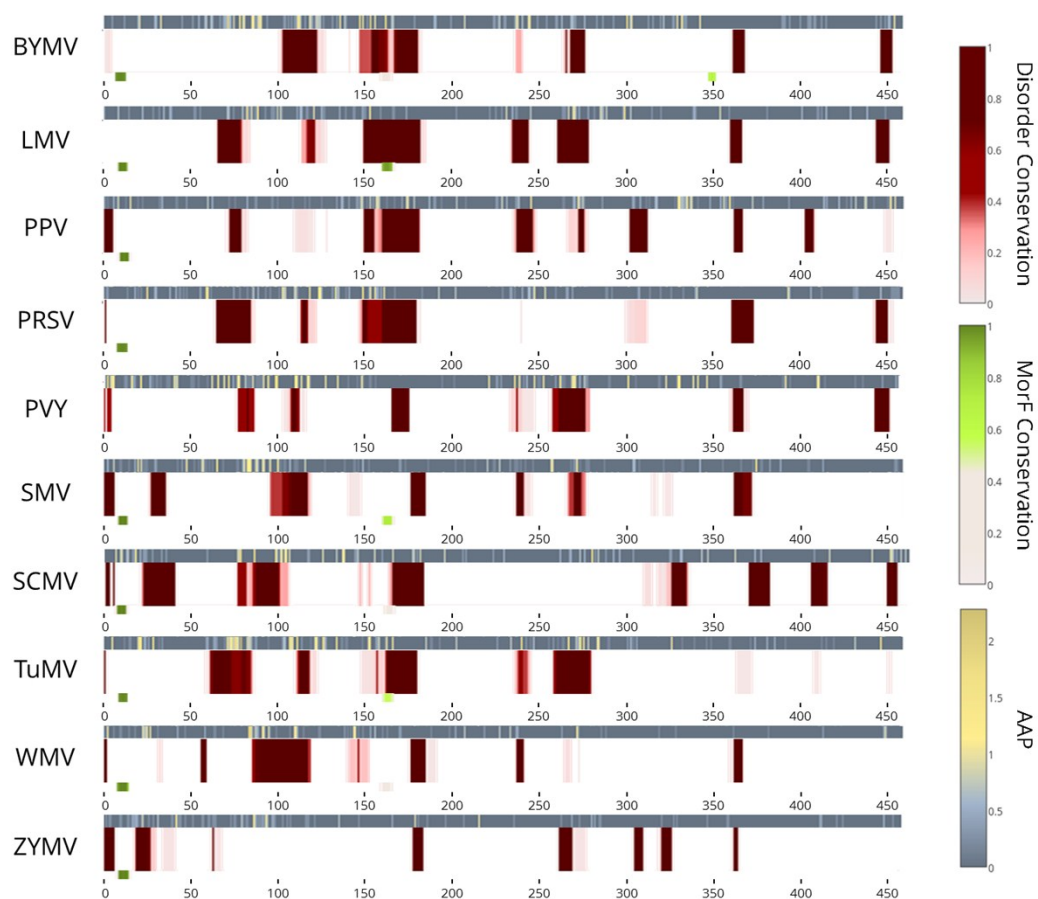

**FIG S2. A) Intrinsic disorder conservation of HC-pro protein.** For all figures of S2, white-to-red gradation bar represent degree of disorder conservation, from 0% (white) to 100% (dark red). White-to-green bar represent MorFs conservation signal, from 0% (white) to 100% (dark green). Blue-to-yellow bar represents amino acid polymorphism (AAP). By definition, 0 to 1 represent highly conserved position, 1 to 2 is considered as conserved and higher than 2 is considered as variable.

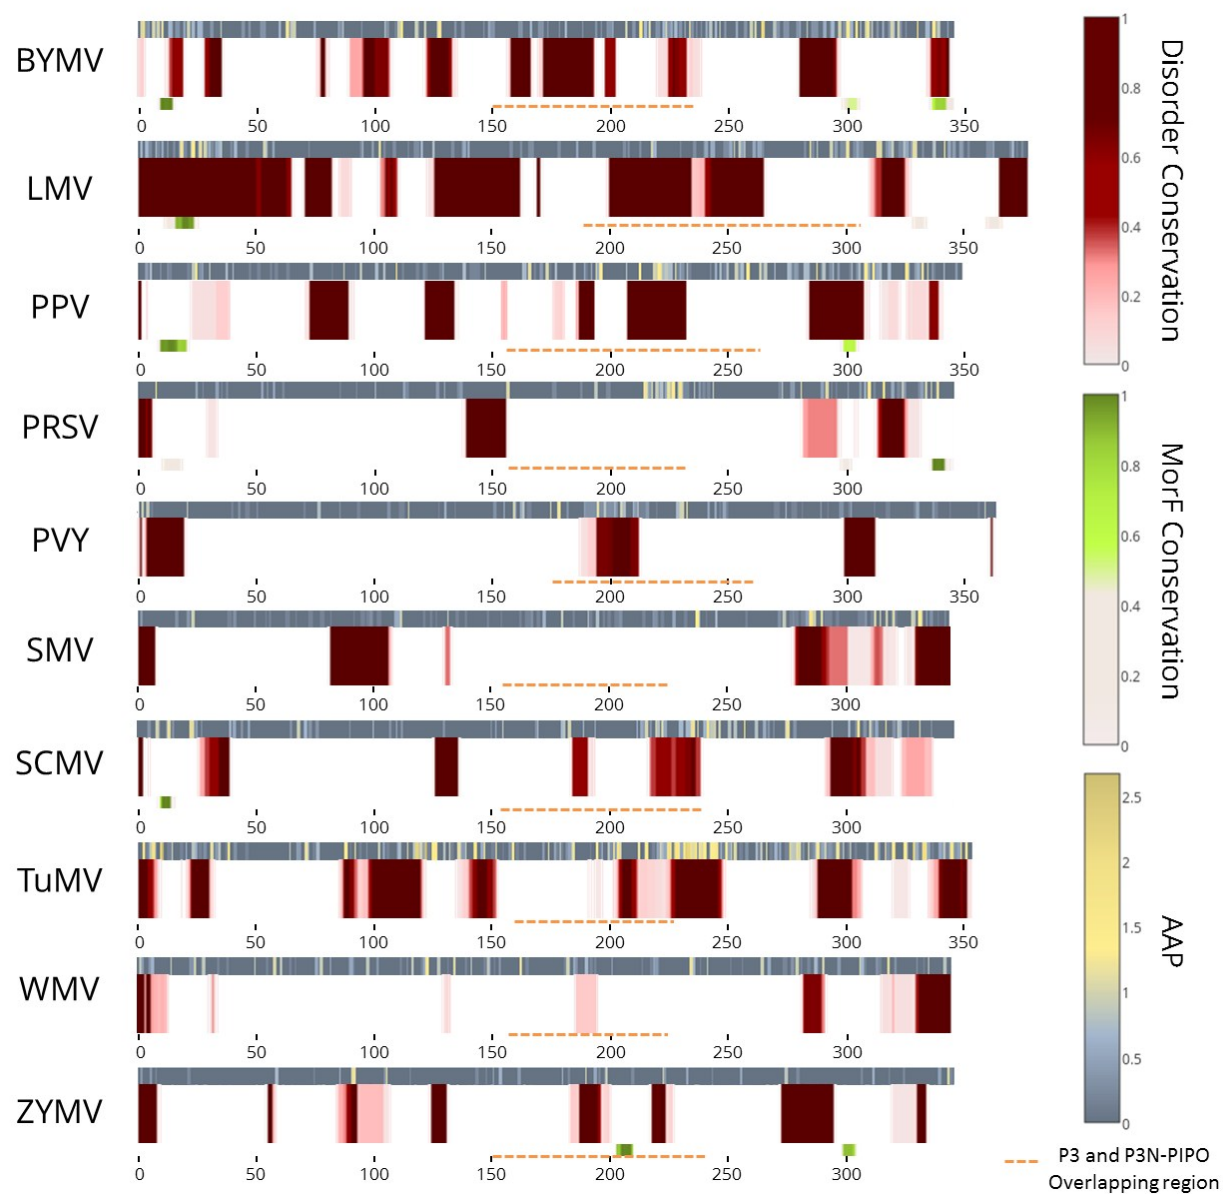

**FIG S2. B) Intrinsic disorder conservation of P3 protein.**

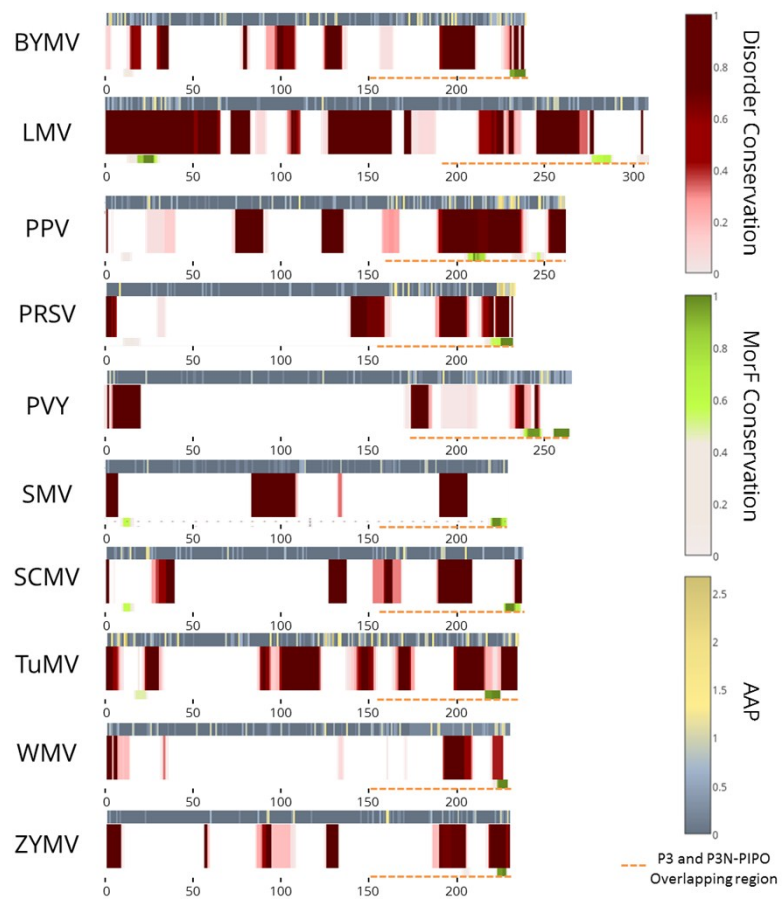

**FIG S2. C) Intrinsic disorder conservation of P3N-PIPO protein.**

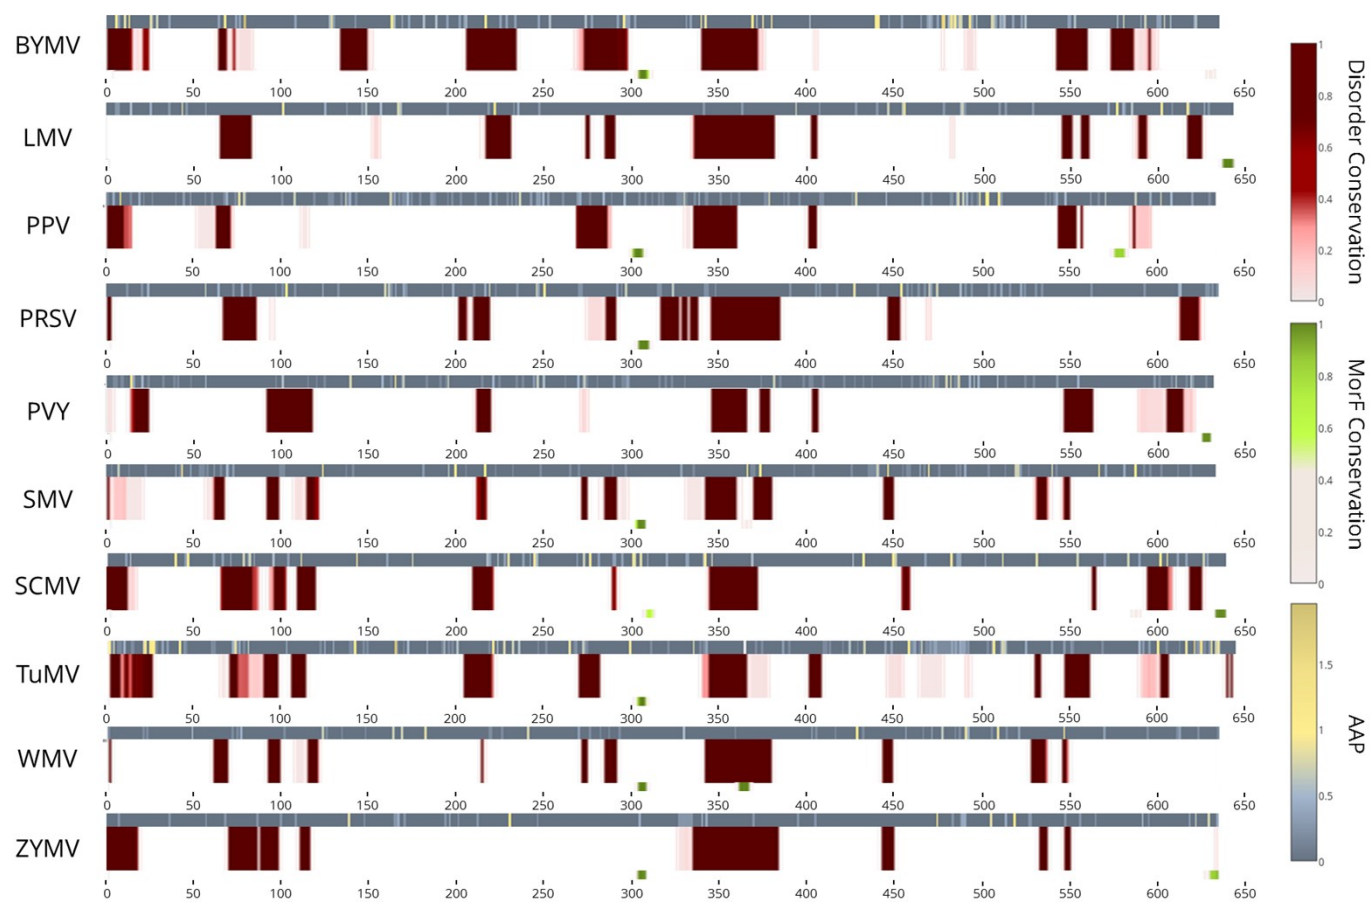

**FIG S2. D) Intrinsic disorder conservation of CI protein.**

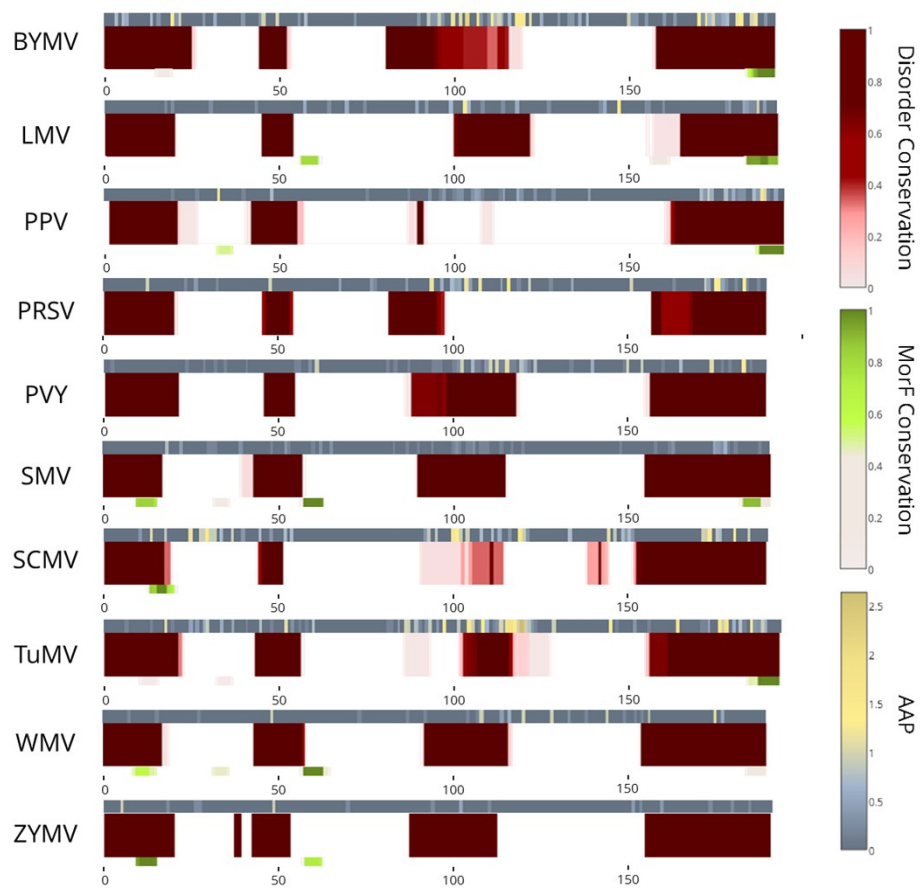

**FIG S2. E) Intrinsic disorder conservation of VPg protein.**



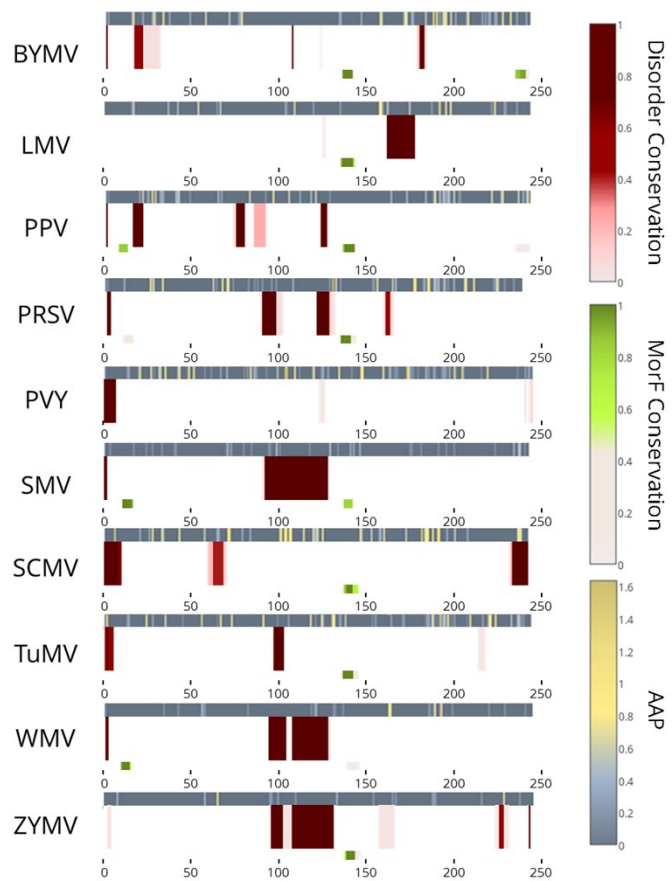

**FIG S2. F) Intrinsic disorder conservation of NIa-pro protein.**

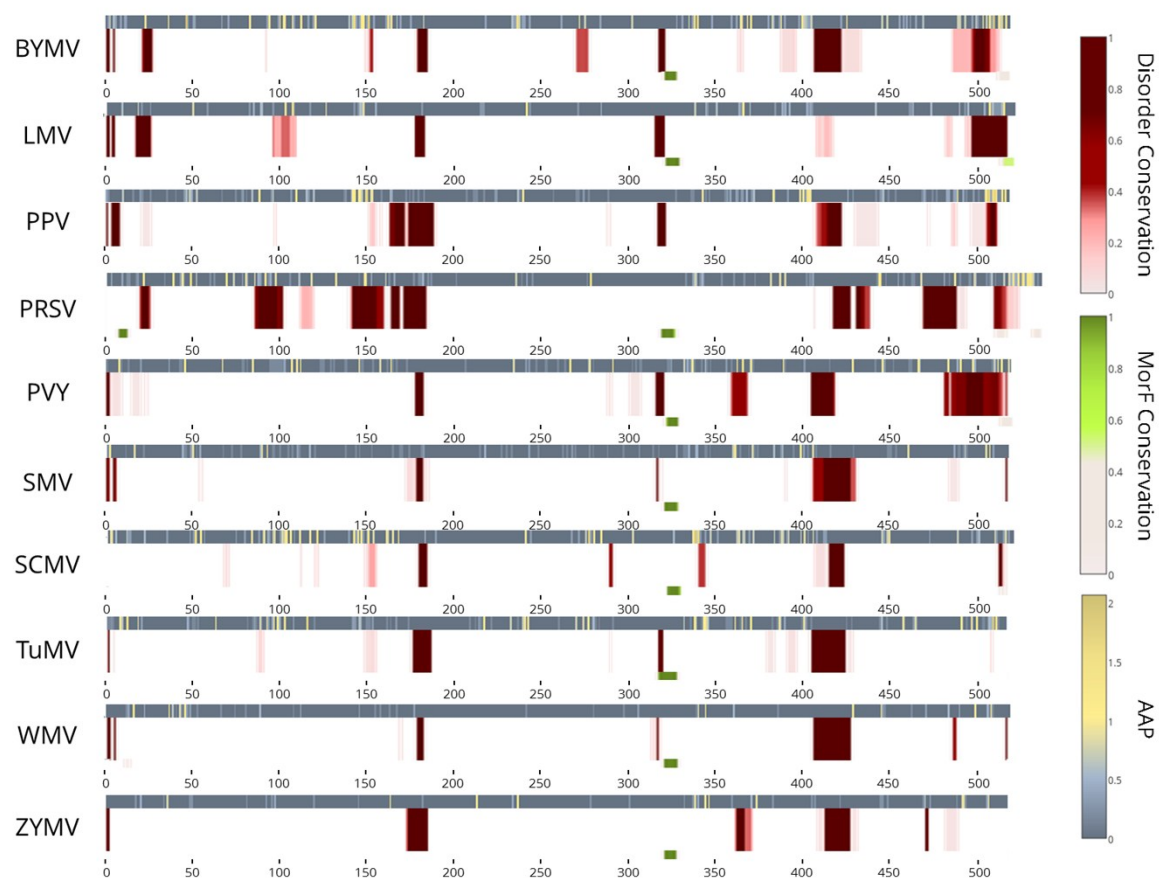

**FIG S2. G) Intrinsic disorder conservation of Nib protein.**

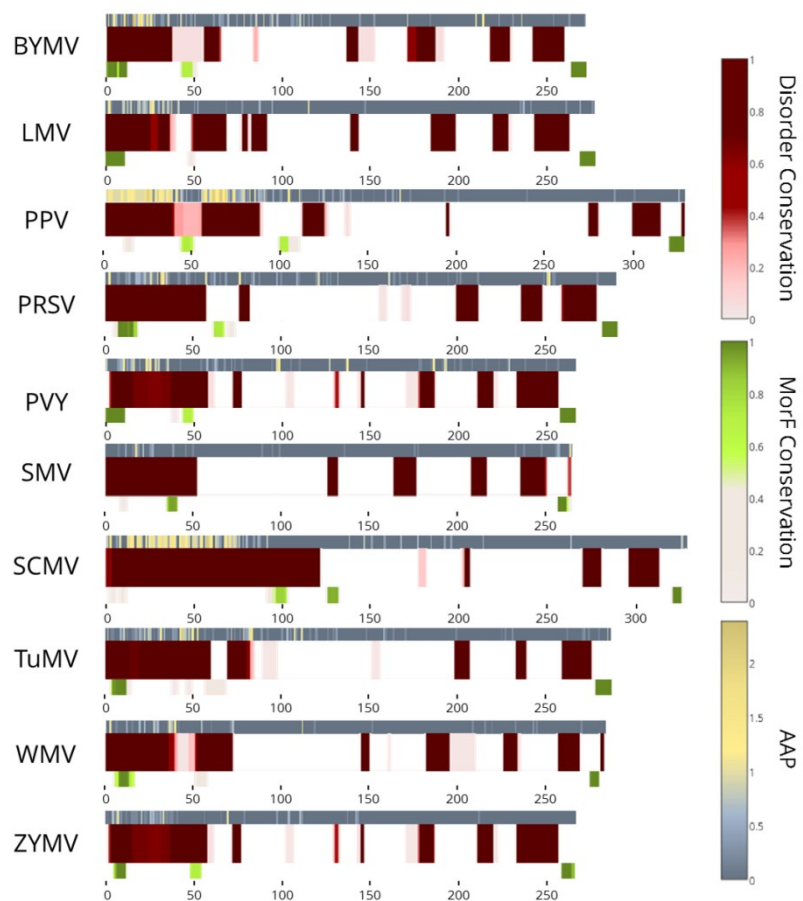

**FIG S2. H) Intrinsic disorder conservation of Coat Protein (CP).**
